# Supplementary material for: Multimodal targeting of glioma with functionalized nanoparticles
Source: Springer Nature journal article supplement (doi:10.1186/s12935-022-02687-8), 2022-08-23
Supplement: MOESM1 [file 23393480]

## ClinicalTrials.gov Search Results 08/01/2022

|   | Title                                                                                                                                 | Status                 | Study Results        | Conditions                                                                                                                                                          | Interventions                                                                                                                                                                                                | Locations                                                                                                                                                                                                                                                                                                                                                                   |
|---|---------------------------------------------------------------------------------------------------------------------------------------|------------------------|----------------------|---------------------------------------------------------------------------------------------------------------------------------------------------------------------|--------------------------------------------------------------------------------------------------------------------------------------------------------------------------------------------------------------|-----------------------------------------------------------------------------------------------------------------------------------------------------------------------------------------------------------------------------------------------------------------------------------------------------------------------------------------------------------------------------|
| 1 | <a href="#">MTX110 by Convection-Enhanced Delivery in Treating Participants With Newly-Diagnosed Diffuse Intrinsic Pontine Glioma</a> | Completed              | Has Results          | <ul style="list-style-type: none"> <li>•Diffuse Intrinsic Pontine Glioma</li> </ul>                                                                                 | <ul style="list-style-type: none"> <li>•Drug: Panobinostat Nanoparticle Formulation MTX110</li> <li>•Drug: Convection-Enhanced Delivery (CED)</li> </ul>                                                     | <ul style="list-style-type: none"> <li>•University of California, San Francisco, San Francisco, California, United States</li> </ul>                                                                                                                                                                                                                                        |
| 2 | <a href="#">ABI-009 (Nab-rapamycin) in Recurrent High Grade Glioma and Newly Diagnosed Glioblastoma</a>                               | Active, not recruiting | No Results Available | <ul style="list-style-type: none"> <li>•High Grade Recurrent Glioma and Newly Diagnosed Glioblastoma</li> </ul>                                                     | <ul style="list-style-type: none"> <li>•Drug: ABI-009</li> <li>•Drug: Bevacizumab</li> <li>•Drug: Temozolomide</li> <li>•Drug: Lomustine</li> <li>•Radiation: Radiation</li> <li>•Drug: Marizomib</li> </ul> | <ul style="list-style-type: none"> <li>•St. Joseph Heritage Healthcare, Fullerton, California, United States</li> <li>•Hoag Memorial Hospital Presbyterian, Newport Beach, California, United States</li> <li>•John Wayne Cancer Institute, Santa Monica, California, United States</li> </ul>                                                                              |
| 3 | <a href="#">CED of MTX110 Newly Diagnosed Diffuse Midline Gliomas</a>                                                                 | Recruiting             | No Results Available | <ul style="list-style-type: none"> <li>•Diffuse Intrinsic Pontine Glioma</li> <li>•Diffuse Pontine and Thalamic Gliomas</li> <li>•Diffuse Midline Glioma</li> </ul> | <ul style="list-style-type: none"> <li>•Drug: Infusate with MTX110 and gadolinium</li> <li>•Device: Convection-Enhanced Delivery (CED)</li> </ul>                                                            | <ul style="list-style-type: none"> <li>•Columbia University Irving Medical Center, New York, New York, United States</li> </ul>                                                                                                                                                                                                                                             |
| 4 | <a href="#">A Phase I Trial of Nanoliposomal CPT-11 (NL CPT-11) in Patients With Recurrent High-Grade Gliomas</a>                     | Completed              | No Results Available | <ul style="list-style-type: none"> <li>•Glioblastoma</li> <li>•Gliosarcoma</li> <li>•Anaplastic Astrocytoma</li> <li>•Anaplastic Oligodendroglioma</li> </ul>       | <ul style="list-style-type: none"> <li>•Drug: Nanoliposomal CPT-11</li> </ul>                                                                                                                                | <ul style="list-style-type: none"> <li>•University of California, San Francisco, San Francisco, California, United States</li> </ul>                                                                                                                                                                                                                                        |
| 5 | <a href="#">Assessing Dynamic Magnetic Resonance (MR) Imaging in Patients With Recurrent High Grade Glioma Receiving Chemotherapy</a> | Terminated             | No Results Available | <ul style="list-style-type: none"> <li>•Brain Neoplasms</li> </ul>                                                                                                  | <ul style="list-style-type: none"> <li>•Drug: Ferumoxytol</li> </ul>                                                                                                                                         | <ul style="list-style-type: none"> <li>•Oregon Health &amp; Science University, Portland, Oregon, United States</li> </ul>                                                                                                                                                                                                                                                  |
| 6 | <a href="#">AGuIX Nanoparticles With Radiotherapy Plus Concomitant Temozolomide in the Treatment of Newly Diagnosed Glioblastoma</a>  | Recruiting             | No Results Available | <ul style="list-style-type: none"> <li>•Glioblastoma</li> </ul>                                                                                                     | <ul style="list-style-type: none"> <li>•Drug: Polysiloxane Gd-Chelates based nanoparticles (AGuIX)</li> <li>•Radiation: radiotherapy</li> <li>•Drug: Temozolomide</li> </ul>                                 | <ul style="list-style-type: none"> <li>•CHU de Brest, Brest, France</li> <li>•Centre Jean Perrin, Clermont-Ferrand, France</li> <li>•CHU de Grenoble, Grenoble, France</li> <li>•Centre Léon Berard, Lyon, France</li> <li>•Institut de Cancérologie de l'Ouest, Saint Herblain, France</li> <li>•Institut de Cancérologie Strasbourg Europe, Strasbourg, France</li> </ul> |
| 7 | <a href="#">NU-0129 in Treating Patients With Recurrent Glioblastoma or Gliosarcoma Undergoing Surgery</a>                            | Completed              | No Results Available | <ul style="list-style-type: none"> <li>•Gliosarcoma</li> <li>•Recurrent Glioblastoma</li> </ul>                                                                     | <ul style="list-style-type: none"> <li>•Other: Laboratory Biomarker Analysis</li> <li>•Other: Pharmacological Study</li> <li>•Drug: Targeted Molecular Therapy</li> </ul>                                    | <ul style="list-style-type: none"> <li>•Northwestern University, Chicago, Illinois, United States</li> </ul>                                                                                                                                                                                                                                                                |
| 8 | <a href="#">Phase II Study of Combined Temozolomide and SGT-53 for Treatment of Recurrent Glioblastoma</a>                            | Terminated             | Has Results          | <ul style="list-style-type: none"> <li>•RECURRENT GLIOBLASTOMA</li> </ul>                                                                                           | <ul style="list-style-type: none"> <li>•Genetic: SGT-53</li> <li>•Drug: Temozolomide</li> </ul>                                                                                                              | <ul style="list-style-type: none"> <li>•MD Anderson Cancer Center, Houston, Texas, United States</li> <li>•China Medical University Hospital, Taichung, Taiwan</li> </ul>                                                                                                                                                                                                   |

|    | Title                                                                                                                                                       | Status         | Study Results        | Conditions                                                                                                                                                                                                                                                                                                                                            | Interventions                                                                                                                                                                                                                                                                                                                      | Locations                                                                                                                                                                                                                                                                                                                                                                                                                                                                                                                                                                                                                                                                                                                                                                                                                                                                             |
|----|-------------------------------------------------------------------------------------------------------------------------------------------------------------|----------------|----------------------|-------------------------------------------------------------------------------------------------------------------------------------------------------------------------------------------------------------------------------------------------------------------------------------------------------------------------------------------------------|------------------------------------------------------------------------------------------------------------------------------------------------------------------------------------------------------------------------------------------------------------------------------------------------------------------------------------|---------------------------------------------------------------------------------------------------------------------------------------------------------------------------------------------------------------------------------------------------------------------------------------------------------------------------------------------------------------------------------------------------------------------------------------------------------------------------------------------------------------------------------------------------------------------------------------------------------------------------------------------------------------------------------------------------------------------------------------------------------------------------------------------------------------------------------------------------------------------------------------|
| 9  | <a href="#">9-ING-41 in Patients With Advanced Cancers</a>                                                                                                  | Recruiting     | No Results Available | <ul style="list-style-type: none"> <li>•Cancer</li> <li>•Pancreatic Cancer</li> <li>•Sarcoma</li> <li>•Renal Cancer</li> <li>•Refractory Cancer</li> <li>•Refractory Neoplasm</li> <li>•Refractory Non-Hodgkin Lymphoma</li> <li>•Pancreatic Adenocarcinoma</li> <li>•Resistant Cancer</li> <li>•Neoplasm Metastasis</li> <li>•and 15 more</li> </ul> | <ul style="list-style-type: none"> <li>•Drug: 9-ING-41</li> <li>•Drug: Gemcitabine - 21 day cycle</li> <li>•Drug: Doxorubicin.</li> <li>•Drug: Lomustine</li> <li>•Drug: Carboplatin.</li> <li>•Drug: Nab paclitaxel.</li> <li>•Drug: Paclitaxel.</li> <li>•Drug: Gemcitabine - 28 day cycle</li> <li>•Drug: Irinotecan</li> </ul> | <ul style="list-style-type: none"> <li>•Mayo Clinic, Phoenix, Arizona, United States</li> <li>•UCSF Helen Diller Family Comprehensive Cancer Center, San Francisco, California, United States</li> <li>•Miami Cancer Institute, Miami, Florida, United States</li> <li>•Robert H. Lurie Comprehensive Cancer Center of Northwestern University, Chicago, Illinois, United States</li> <li>•Kansas University Cancer Center, Kansas City, Kansas, United States</li> <li>•University of Michigan, Ann Arbor, Michigan, United States</li> <li>•Rhode Island Hospital, Providence, Rhode Island, United States</li> <li>•Sanford Research, Sioux Falls, South Dakota, United States</li> <li>•Vanderbilt-Ingram Cancer Center, Nashville, Tennessee, United States</li> <li>•Fred Hutchinson Cancer Research Center, Seattle, Washington, United States</li> <li>•and 3 more</li> </ul> |
| 10 | <a href="#">A Study to Evaluate the Safety, Tolerability and Immunogenicity of EGFR(V)-EDV-Dox in Subjects With Recurrent Glioblastoma Multiforme (GBM)</a> | Unknown status | No Results Available | <ul style="list-style-type: none"> <li>•Glioblastoma</li> <li>•Astrocytoma, Grade IV</li> </ul>                                                                                                                                                                                                                                                       | <ul style="list-style-type: none"> <li>•Drug: EGFR(V)-EDV-Dox</li> </ul>                                                                                                                                                                                                                                                           | <ul style="list-style-type: none"> <li>•John Hopkins Hospital, Baltimore, Maryland, United States</li> <li>•Lenox Hill Hospital, Northwell Health, New York, New York, United States</li> </ul>                                                                                                                                                                                                                                                                                                                                                                                                                                                                                                                                                                                                                                                                                       |
